# Supplementary material for: Mouse Breast Carcinoma Monocytic/Macrophagic Myeloid-Derived Suppressor Cell Infiltration as a Consequence of Endothelial Dysfunction in Shb-Deficient Endothelial Cells Increases Tumor Lung Metastasis
Source: MDPI journal article supplement (doi:10.3390/ijms222111478), 2021-10-25
Supplement: s1 [file s1]

## Supplemental data

W T

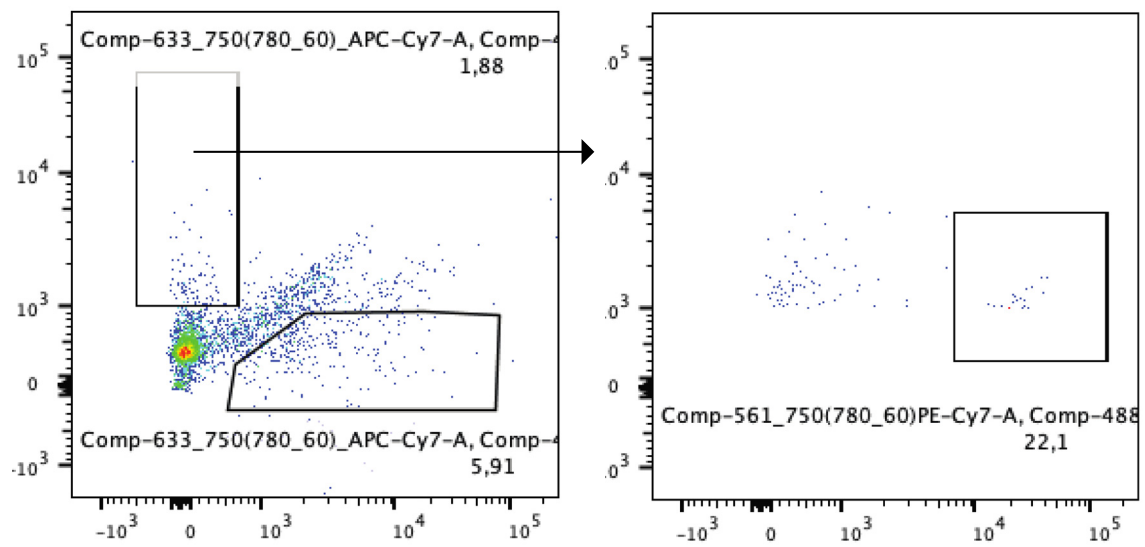

KO

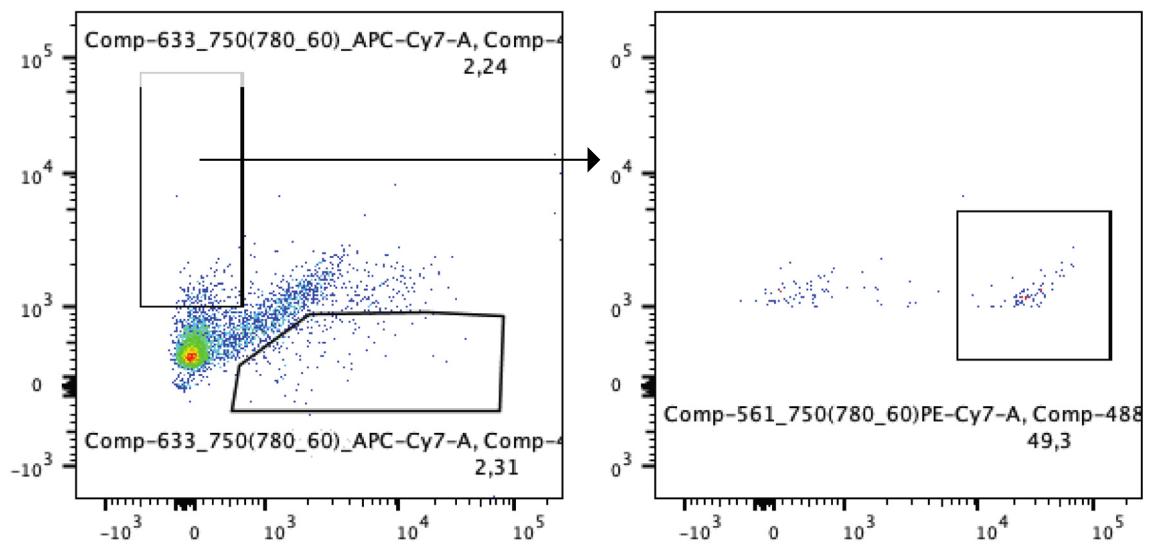

CD4 (FITC) ↑  
 CD8 (APC-Cy7) →  
 FoxP3 (PE-Cy7) →

Figure S1: Gating strategy for T cells.

W T

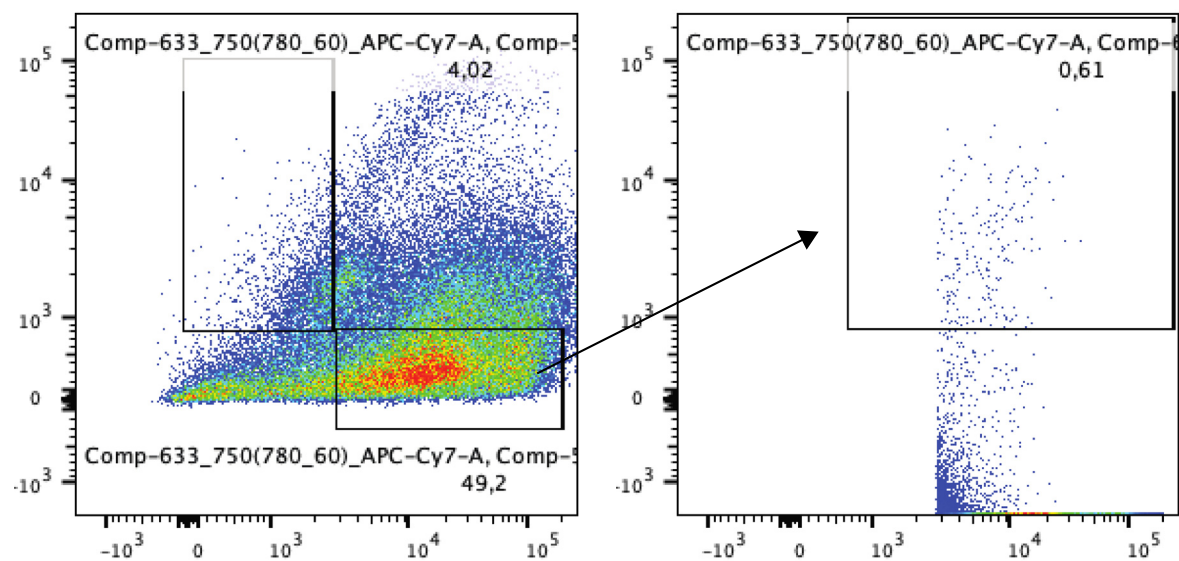

KO

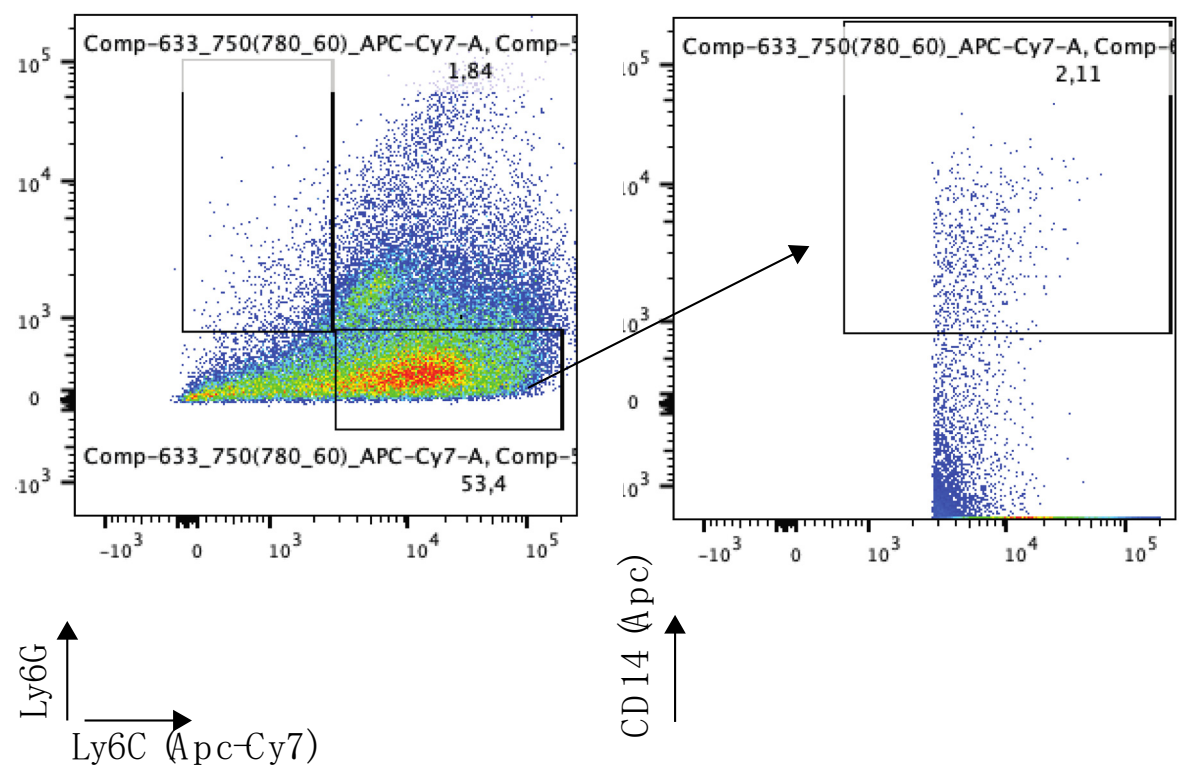

Figure S2: Gating strategy for mMDSC.

Table S1: Immunological reagents.

| <b>Antibody target</b>                       | <b>Host</b> | <b>Supplier</b> | <b>Catalog number</b> | <b>Fluorophore/Tag</b> |
|----------------------------------------------|-------------|-----------------|-----------------------|------------------------|
| Mouse CD31                                   | Rat         | BD bioscience   | 553370                | none                   |
| Desmin                                       | Goat        | Abcam           | ab80503               | none                   |
| Mouse fibrinogen                             | Goat        | Gentaur Mol     | GAM/fbg/7s            | none                   |
| Mouse CD15                                   | Mouse       | Biolegend       | 125604                | Biotin                 |
| Rat IgG                                      | Donkey      | Invitrogen      | A21209                | Alexa 594              |
| Goat IgG                                     | Donkey      | Invitrogen      | A11055                | Alexa 488              |
| Mouse CD4                                    | Rat         | eBioscience     | 11-0041-82            | FITC                   |
| Mouse CD8a                                   | Rat         | BD bioscience   | 560182                | APC-Cy7                |
| FoxP3                                        | Rat         | eBioscience     | 25-5773-82            | PE-Cy7                 |
| Mouse CD11b                                  | Hamster     | Biolegend       | 101206                | FITC                   |
| Mouse CD11c                                  | Hamster     | Biolegend       | 117310                | APC                    |
| Mouse Ly6C                                   | Rat         | Biolegend       | 128026                | APC-Cy7                |
| Mouse Ly6G                                   | Rat         | Biolegend       | 127608                | PE                     |
| Mouse CD14                                   | Rat         | Biolegend       | 123312                | APC                    |
| Streptavidin                                 |             | Biolegend       | 405214                | PercP-Cy5.5            |
| <b>MACS microbeads from Miltenyi Biotech</b> |             |                 |                       |                        |
| Anti-Biotin                                  | 130-090-485 |                 |                       |                        |
| Anti-CD31                                    | 130-097-418 |                 |                       |                        |
| Anti-CD11b                                   | 130-049-601 |                 |                       |                        |

Table S2: qPCR primer sequences.

| Gene           | Forward primer                  | Reverse primer                |
|----------------|---------------------------------|-------------------------------|
| <i>Actb</i>    | CAC TAT TTG GCA ACG AGC GG      | TCC ATA CCC AAG AAG GAA GGC   |
| <i>Shb</i>     | TTT GAT GCC AAG AGC GAC CT      | GAG TCT GAG TCC ACG CTC TG    |
| <i>Il6</i>     | CTTCCATCCAGTTGCCTTCTTG          | AATTAAGCCTCCGACTTGTGAAG       |
| <i>Il1b</i>    | ACGGATTCCATGGTGAAGTC            | GAGTGTGGATCCCAAGCAAT          |
| <i>Il17a</i>   | TCTTTAACTCCCTTGCGCA             | TCAGGGTCTTCATTGCGGTG          |
| <i>Tnf</i>     | ACTGCCAGAAGAGGCACTCC            | CGA TCA CCC CGA AGT TCA       |
| <i>Ifng</i>    | CCT GGG GCC TAG CTC TGA         | CAG CCA GGA ACA GCC ATG AG    |
| <i>Tbx21</i>   | CCACCTGTTGTGGTCCAAGT            | TAATGGCTTGTGGGCTCCAG          |
| <i>Cxcl1</i>   | ACTCAAGAATGGTTCGCGAGG           | ACTTGGGGACACCTTTTAGCA         |
| <i>Cxcl9</i>   | CCAAGCCCCAATTGCAACAA            | AGTCCGGATCTAGGCAGGTT          |
| <i>Cxcl10</i>  | GCT GCC GTC ATT TTC TGC         | TCT CAC TGG CCC GTC ATC       |
| <i>Cxcl11</i>  | CGGCTGCGACAAAGTTGAAG            | TATGAGGCGAGCTTGCTTGG          |
| <i>Cxcl12</i>  | TGCATCAGTGACGGTAAACCA           | TTCTTCAGCCGTGCAACAATC         |
| <i>Cxcr4</i>   | ATG ACC AGG ATC ACC AAT CCA     | CGG GAT GAA AAC GTC CAT TT    |
| <i>Ccl2</i>    | CACTCACCTGCTGCTACTAC            | GCTTGGTGACAAAACTACAGC         |
| <i>Ccl3</i>    | GCAACCAAGTCTTCTCAGCG            | GGAAAATGACACCTGGCTGG          |
| <i>Ccl4</i>    | AACCTAACCCCGAGCAACAC            | TGCCGGGAGGTGTAAGAGAA          |
| <i>Ccl20</i>   | ATCTGTGTGCGCTGATCCAA            | CTCCTTGGGCTGTGTCCAAT          |
| <i>Ccl21</i>   | GTGATGGAGGGGGTTCAGG             | GGGATGGGACAGCCTAAA            |
| <i>Ccl22</i>   | TCT GAT GCA GGT CCC TAT GGT     | TTA TGG AGT AGC TTC TTC AC    |
| <i>Ccr7</i>    | TGTACGAGTCGGTGTGCTTC            | GGTAGGTATCCGTCATGGTCTTG       |
| <i>Csf1</i>    | AACAGCTGCTTCACCAAGGA            | GCTGGAGAGGAGTCTCATGG          |
| <i>Csf2</i>    | GGCCTTGGAAGCATGTAGAGG           | GGAGAACTCGTTAGAGACGACTT       |
| <i>Csf3</i>    | ATTGGCTCAACTTTCTGCCCAG          | CTGACAGTGACCAGGGGAAC          |
| <i>Nos2</i>    | GTT CTC AGC CCA ACA ATA CAA GA  | GTG GAC GGG TCG ATG TCA C     |
| <i>Gata3</i>   | CGA GAT GGT ACC GGG CAC TA      | GAC AGT TCG CGC AGG ATG T     |
| <i>Arg1</i>    | TGG CTT GCG AGA CGT AGA C       | GCT CAG GTG AAT CGG CCT TTT   |
| <i>Il4</i>     | CGG AGA TGG ATG TGC CAA AA      | GCA CCT TGG AAG CCC TAC AG    |
| <i>Il5</i>     | CTCTGTTGACAAGCAATGAGACG         | TCTTCAGTATGTCTAGCCCCTG        |
| <i>Il13</i>    | CAG CAT GGT ATG GAG TGT GG      | CCT CTT GCC GAC ATG GAA TA    |
| <i>Il10</i>    | CTG GAC AAC ATA CTG CTA ACC G   | GGG CAT CAC TTC TAC CAG GTA A |
| <i>Il12a</i>   | AGCCTTCCTCCTATCAGCCA            | GTGTGCAGCCCCTAGAATGT          |
| <i>Cd4</i>     | GAGGGGTGAACCAGACAGTG            | ATTCGTGCTGCCTGGCG             |
| <i>Cd8a</i>    | CTAGACGTGGAGGAAGACGC            | GAGGACCATGGGTGACTCTT          |
| <i>Foxp3</i>   | TTA TCC GAT GGG CCA TCC T       | CAA AGC ACT TGT GCA GGC TC    |
| <i>Gzmb</i>    | CTGCAAAAACAGCTCTGTCCAA          | CTCCTCCTTAGCCGTGATGT          |
| <i>Sl100a9</i> | TGGGCTTACACTGCTCTTACC           | GGTTATGCTGCGCTCCATCT          |
| <i>Itgam</i>   | CCT TCA TCA ACA CAA CCA GAG TGG | CGA GGT GCT CCT AAA ACC AAG C |
| <i>Itgax</i>   | CCT GAG GGT GGG CTG GAT         | GCC AAT TTC CTC CGG ACA T     |
| <i>Adgre1</i>  | GGA AAC CAC CAT GTT AGC TGC     | GGA AAC CAC CAT GTT AGC TGC   |
| <i>Pdcd1</i>   | ATCTACCTCTGTGGGGCCAT            | AGGTCTCCAGGATTCTCTGT          |
| <i>Cd274</i>   | GGCAGGAGAGGAGGACCTTA            | CTGTGATCTGAAGGGCAGCA          |
| <i>Ctla4</i>   | ACGCAGATTTATGTCAATTGATCCAG      | AACCCCAAGCTAACTGCGAC          |
| <i>Tgfb1</i>   | CAGCCCTGCTCACCCTCGTG            | GGTTTGTGGCTCCCGAGGGC          |
| <i>Tgfb2</i>   | CACACACACACACACACACC            | TGCAAAGCTCGCCAACCATCTC        |
| <i>Tgfb3</i>   | AAAGGATCACCACAACCCACAC          | TCTTCTTCCTCTGACTGCCCTG        |
